# Supplementary material
Source: Research Square preprint supplement (doi:10.21203/rs.3.rs-8601520/v1)
Supplement: Supplementary file 1 [file 1311288d63bd7370aedc32da.docx]

**Appendix-1**

**Results of Logistic Regression**

| **Multinomial Logistic Regression( Day 5 Funders type Dependent variable and day 1 variables independent)**  **Model Fit Measures** | | | | | | | | | | |
| --- | --- | --- | --- | --- | --- | --- | --- | --- | --- | --- |
|  | | | | | | | | **Overall Model Test** | | |
| **Model** | **Deviance** | | **AIC** | | | **R²McF** | | **χ²** | **df** | **p** |
| 1 | 321 | | 353 | | | 0.193 | | 77.0 | 12 | <.001 |
| Note. Models estimated using sample size of N=176 | | | | | | | | | | |
| Omnibus Likelihood Ratio Tests | | | | | | |
| **Predictor** | | **χ²** | | **df** | **p** | |
| FAQ_Count(Day 1) | | 1.30 | | 4 | 0.861 | |
| Update_Count(Day1) | | 12.30 | | 4 | 0.015 | |
| Comment_Count(Day1) | | 46.44 | | 4 | <.001 | |

| Model Coefficients - Funders_Category (Day 5) | | | | | | | | | | | | | |
| --- | --- | --- | --- | --- | --- | --- | --- | --- | --- | --- | --- | --- | --- |
| **Funders_Category (Day 5)** | | **Predictor** | | | **Estimate** | | **SE** | | | **Z** | **p** | | **Odds ratio** |
| **>100 - <40** | | **Intercept** | | | -1.74597 | | 0.2627 | | | -6.647 | <.001 | | 0.1745 |
| **FAQ_Count(Day 1)** | | | 0.00598 | | 0.0498 | | | 0.120 | 0.904 | | 1.0060 |
| **Update_Count(Day1)** | | | 1.24495 | | 0.6158 | | | 2.022 | 0.043 | | 3.4728 |
| **Comment_Count(Day1)** | | | 0.79630 | | 0.2451 | | | 3.249 | 0.001 | | 2.2173 |
| **>80<100 - <40** | | **Intercept** | | | -3.73429 | | 0.6408 | | | -5.827 | <.001 | | 0.0239 |
| **FAQ_Count(Day 1)** | | | -0.06478 | | 0.1436 | | | -0.451 | 0.652 | | 0.9373 |
| **Update_Count(Day1)** | | | 1.14414 | | 1.1961 | | | 0.957 | 0.339 | | 3.1397 |
| **Comment_Count(Day1)** | | | 0.76842 | | 0.2529 | | | 3.039 | 0.002 | | 2.1563 |
| **>60<80 - <40** | | **Intercept** | | | -2.77998 | | 0.4102 | | | -6.778 | <.001 | | 0.0620 |
| **FAQ_Count(Day 1)** | | | -0.04105 | | 0.0813 | | | -0.505 | 0.613 | | 0.9598 |
| **Update_Count(Day1)** | | | 1.64098 | | 0.7392 | | | 2.220 | 0.026 | | 5.1602 |
| **Comment_Count(Day1)** | | | 0.72313 | | 0.2496 | | | 2.897 | 0.004 | | 2.0609 |
| **>40<60 - <40** | | **Intercept** | | | -2.42107 | | 0.3599 | | | -6.727 | <.001 | | 0.0888 |
| **FAQ_Count(Day 1)** | | | -0.05205 | | 0.0773 | | | -0.673 | 0.501 | | 0.9493 |
| **Update_Count(Day1)** | | | 2.04715 | | 0.6538 | | | 3.131 | 0.002 | | 7.7458 |
| **Comment_Count(Day1)** | | | 0.60553 | | 0.2607 | | | 2.323 | 0.020 | | 1.8322 |
| **Multinomial Logistic Regression(Day 10 Funders status dependent variable and day 5 independent variables)**  Model Fit Measures | | | | | | | | | | | |
|  | | | | | | **Overall Model Test** | | | | | |
| **Model** | **Deviance** | | **AIC** | **R²McF** | | **χ²** | | **df** | **p** | | |
| 1 | 282 | | 314 | 0.321 | | 133 | | 12 | <.001 | | |
| Note. Models estimated using sample size of N=176 | | | | | | | | | | | |

| Omnibus Likelihood Ratio Tests | | | | | |
| --- | --- | --- | --- | --- | --- |
| **Predictor** | | **χ²** | **df** | **p** | |
| FAQ_Count (Day 5) | | 3.64 | 4 | 0.457 | |
| Update_Count (Day 5) | | 18.85 | 4 | <.001 | |
| Comment_Count (Day 5) | | 93.11 | 4 | <.001 | |
| Model Coefficients - Funders_Category (Day 10) | | | | | | | | | | |
| **Funders_Category (Day 10)** | **Predictor** | | | | **Estimate** | | **SE** | **Z** | **p** | **Odds ratio** |
| **>100 - <40** | **Intercept** | | | | -3.0306 | | 0.4325 | -7.008 | <.001 | 0.0483 |
| **FAQ_Count (Day 5)** | | | | -0.1008 | | 0.0771 | -1.306 | 0.191 | 0.9041 |
| **Update_Count (Day 5)** | | | | 0.6030 | | 0.1784 | 3.380 | <.001 | 1.8277 |
| **Comment_Count (Day 5)** | | | | 0.7558 | | 0.1733 | 4.361 | <.001 | 2.1294 |
| **>80<100 - <40** | **Intercept** | | | | -3.5510 | | 0.5530 | -6.422 | <.001 | 0.0287 |
| **FAQ_Count (Day 5)** | | | | -0.0452 | | 0.0811 | -0.557 | 0.578 | 0.9558 |
| **Update_Count (Day 5)** | | | | 0.4057 | | 0.2423 | 1.674 | 0.094 | 1.5004 |
| **Comment_Count (Day 5)** | | | | 0.6666 | | 0.1758 | 3.791 | <.001 | 1.9476 |
| **>60<80 - <40** | **Intercept** | | | | -3.4949 | | 0.5700 | -6.131 | <.001 | 0.0304 |
| **FAQ_Count (Day 5)** | | | | -0.0860 | | 0.1093 | -0.787 | 0.431 | 0.9176 |
| **Update_Count (Day 5)** | | | | 0.5763 | | 0.2185 | 2.638 | 0.008 | 1.7794 |
| **Comment_Count (Day 5)** | | | | 0.5418 | | 0.1966 | 2.756 | 0.006 | 1.7191 |
| **>40<60 - <40** | **Intercept** | | | | -2.3714 | | 0.3614 | -6.561 | <.001 | 0.0933 |
| **FAQ_Count (Day 5)** | | | | -0.1141 | | 0.0868 | -1.314 | 0.189 | 0.8922 |
| **Update_Count (Day 5)** | | | | 0.5586 | | 0.1698 | 3.290 | 0.001 | 1.7483 |
| **Comment_Count (Day 5)** | | | | 0.5192 | | 0.1770 | 2.934 | 0.003 | 1.6807 |

# Multinomial Logistic Regression( Funders Status Day 20 Dependent variable and other independent variables Day 10)

| Model Fit Measures | | | | | | |
| --- | --- | --- | --- | --- | --- | --- |
|  | | | | **Overall Model Test** | | |
| **Model** | **Deviance** | **AIC** | **R²McF** | **χ²** | **df** | **p** |
| 1 | 288 | 320 | 0.323 | 138 | 12 | <.001 |
| Note. Models estimated using sample size of N=176 | | | | | | |

| Omnibus Likelihood Ratio Tests | | | |
| --- | --- | --- | --- |
| **Predictor** | **χ²** | **df** | **p** |
| FAQ_Count (Day 10) | 6.03 | 4 | 0.197 |
| Update_Count (Day 10) | 17.05 | 4 | 0.002 |
| Comment_Count (Day 10) | 85.23 | 4 | <.001 |

| Model Coefficients - Funders_Category (Day 20) | | | | | | |
| --- | --- | --- | --- | --- | --- | --- |
| **Funders_Category (Day 20)** | **Predictor** | **Estimate** | **SE** | **Z** | **p** | **Odds ratio** |
| **>100 - <40** | **Intercept** | -2.4832 | 0.3732 | -6.65 | <.001 | 0.0835 |
| **FAQ_Count (Day 10)** | -0.0884 | 0.0725 | -1.22 | 0.223 | 0.9154 |
| **Update_Count (Day 10)** | 0.5792 | 0.2067 | 2.80 | 0.005 | 1.7846 |
| **Comment_Count (Day 10)** | 0.9799 | 0.2332 | 4.20 | <.001 | 2.6643 |
| **>80<100 - <40** | **Intercept** | -3.0828 | 0.5458 | -5.65 | <.001 | 0.0458 |
| **FAQ_Count (Day 10)** | -0.2754 | 0.2368 | -1.16 | 0.245 | 0.7593 |
| **Update_Count (Day 10)** | 0.6686 | 0.2782 | 2.40 | 0.016 | 1.9516 |
| **Comment_Count (Day 10)** | 0.6112 | 0.3146 | 1.94 | 0.052 | 1.8427 |
| **>60<80 - <40** | **Intercept** | -3.4765 | 0.5467 | -6.36 | <.001 | 0.0309 |
| **FAQ_Count (Day 10)** | -0.2038 | 0.1362 | -1.50 | 0.135 | 0.8156 |
| **Update_Count (Day 10)** | 0.8042 | 0.2379 | 3.38 | <.001 | 2.2349 |
| **Comment_Count (Day 10)** | 0.8720 | 0.2376 | 3.67 | <.001 | 2.3916 |
| **>40<60 - <40** | **Intercept** | -2.5210 | 0.3926 | -6.42 | <.001 | 0.0804 |
| **FAQ_Count (Day 10)** | -0.0906 | 0.0787 | -1.15 | 0.250 | 0.9134 |
| **Update_Count (Day 10)** | 0.6022 | 0.2154 | 2.80 | 0.005 | 1.8261 |
| **Comment_Count (Day 10)** | 0.7379 | 0.2394 | 3.08 | 0.002 | 2.0915 |

# Multinomial Logistic Regression( Funders status Day 25 dependent variable and others day 20 independent variables )

# Multinomial Logistic Regression

| Model Fit Measures | | | | | | | | | | |
| --- | --- | --- | --- | --- | --- | --- | --- | --- | --- | --- |
|  | | | | | | **Overall Model Test** | | | | |
| **Model** | **Deviance** | **AIC** | | **R²McF** | | **χ²** | | **df** | | **p** |
| 1 | 293 | 325 | | 0.296 | | 123 | | 12 | | <.001 |
| Note. Models estimated using sample size of N=176 | | | | | | | | | | |
| Omnibus Likelihood Ratio Tests | | | | | | | | |
| **Predictor** | | | **χ²** | | **df** | | **p** | |
| FAQ_Count (Day 20) | | | 6.61 | | 4 | | 0.158 | |
| Update_Count (Day 20) | | | 15.98 | | 4 | | 0.003 | |
| Comment_Count (Day 20) | | | 71.51 | | 4 | | <.001 | |

| Model Coefficients - Funders_Category (Day 25) | | | | | | |
| --- | --- | --- | --- | --- | --- | --- |
| **Funders_Category (Day 25)** | **Predictor** | **Estimate** | **SE** | **Z** | **p** | **Odds ratio** |
| **>100 - <40** | **Intercept** | -2.1556 | 0.3424 | -6.295 | <.001 | 0.1158 |
| **FAQ_Count (Day 20)** | -0.1106 | 0.0716 | -1.544 | 0.122 | 0.8953 |
| **Update_Count (Day 20)** | 0.4548 | 0.1436 | 3.166 | 0.002 | 1.5759 |
| **Comment_Count (Day 20)** | 0.5428 | 0.1560 | 3.480 | <.001 | 1.7209 |
| **>80<100 - <40** | **Intercept** | -4.4167 | 0.7933 | -5.567 | <.001 | 0.0121 |
| **FAQ_Count (Day 20)** | 0.0163 | 0.0673 | 0.242 | 0.809 | 1.0164 |
| **Update_Count (Day 20)** | 0.5394 | 0.2065 | 2.612 | 0.009 | 1.7149 |
| **Comment_Count (Day 20)** | 0.4522 | 0.1627 | 2.780 | 0.005 | 1.5718 |
| **>60<80 - <40** | **Intercept** | -3.0125 | 0.4963 | -6.070 | <.001 | 0.0492 |
| **FAQ_Count (Day 20)** | -0.2714 | 0.1863 | -1.456 | 0.145 | 0.7623 |
| **Update_Count (Day 20)** | 0.5130 | 0.1719 | 2.984 | 0.003 | 1.6703 |
| **Comment_Count (Day 20)** | 0.4494 | 0.1625 | 2.765 | 0.006 | 1.5674 |
| **>40<60 - <40** | **Intercept** | -2.4858 | 0.3992 | -6.228 | <.001 | 0.0833 |
| **FAQ_Count (Day 20)** | -0.0471 | 0.0704 | -0.669 | 0.503 | 0.9540 |
| **Update_Count (Day 20)** | 0.3920 | 0.1633 | 2.400 | 0.016 | 1.4799 |
| **Comment_Count (Day 20)** | 0.3917 | 0.1608 | 2.436 | 0.015 | 1.4795 |

**Multinomial Logistic Regression ( Day 29 funders status dependent and day 25 other variables independent)**

| Model Fit Measures | | | | | | | | | | | | | | | |
| --- | --- | --- | --- | --- | --- | --- | --- | --- | --- | --- | --- | --- | --- | --- | --- |
|  | | | | | | | **Overall Model Test** | | | | | | | | |
| **Model** | **Deviance** | **AIC** | | | **R²McF** | | **χ²** | | | **df** | | | **p** | | |
| 1 | 238 | 270 | | | 0.265 | | 85.7 | | | 12 | | | <.001 | | |
| Note. Models estimated using sample size of N=176 | | | | | | | | | | | | | | | |
| Omnibus Likelihood Ratio Tests | | | | | | | | | | | |
| **Predictor** | | | | **χ²** | | **df** | | | **p** | | |
| FAQ_Count (Day 25) | | | | 6.43 | | 4 | | | 0.169 | | |
| Update_Count (Day 25) | | | | 26.75 | | 4 | | | <.001 | | |
| Comment_Count (Day 25) | | | | 25.37 | | 4 | | | <.001 | | |
| Model Coefficients - Funding_Status_Cat (Day 29) | | | | | | | | | | | | | | | | | |
| **Funding_Status_Category (Day 29)** | | | **Predictor** | | | | | **Estimate** | | | **SE** | | | **Z** | **p** | | **Odds ratio** |
| **>100 - <40** | | | **Intercept** | | | | | -0.6659 | | | 0.2618 | | | -2.544 | 0.011 | | 0.5138 |
| **FAQ_Count (Day 25)** | | | | | -0.0185 | | | 0.0604 | | | -0.307 | 0.759 | | 0.9817 |
| **Update_Count (Day 25)** | | | | | 0.6988 | | | 0.1863 | | | 3.751 | <.001 | | 2.0113 |
| **Comment_Count (Day 25)** | | | | | 0.2910 | | | 0.1241 | | | 2.345 | 0.019 | | 1.3377 |
| **>80<100 - <40** | | | **Intercept** | | | | | -2.6063 | | | 0.6006 | | | -4.339 | <.001 | | 0.0738 |
| **FAQ_Count (Day 25)** | | | | | 0.0337 | | | 0.1265 | | | 0.266 | 0.790 | | 1.0342 |
| **Update_Count (Day 25)** | | | | | 0.5328 | | | 0.2931 | | | 1.818 | 0.069 | | 1.7036 |
| **Comment_Count (Day 25)** | | | | | -19.4505 | | | 1.24e-10 | | | -1.56e+11 | <.001 | | 3.57e-9 |
| **>60<80 - <40** | | | **Intercept** | | | | | -4.1748 | | | 0.9069 | | | -4.603 | <.001 | | 0.0154 |
| **FAQ_Count (Day 25)** | | | | | 0.1024 | | | 0.0824 | | | 1.242 | 0.214 | | 1.1078 |
| **Update_Count (Day 25)** | | | | | 0.5210 | | | 0.3494 | | | 1.491 | 0.136 | | 1.6837 |
| **Comment_Count (Day 25)** | | | | | 0.2550 | | | 0.1361 | | | 1.873 | 0.061 | | 1.2904 |
| **>40<60 - <40** | | | **Intercept** | | | | | -2.3864 | | | 0.6149 | | | -3.881 | <.001 | | 0.0920 |
| **FAQ_Count (Day 25)** | | | | | -13.2676 | | | 1.38e-7 | | | -9.60e0+7 | <.001 | | 1.73e-6 |
| **Update_Count (Day 25)** | | | | | 0.1029 | | | 0.5460 | | | 0.188 | 0.850 | | 1.1084 |
| **Comment_Count (Day 25)** | | | | | 0.1885 | | | 0.2186 | | | 0.862 | 0.389 | | 1.2074 |

**Multinomial Logistic Regression ( Day 5 funder category as dependent variable, Day-1 funders (Project backed and Project created)**

| Model Fit Measures | | | | | | | | | | | |
| --- | --- | --- | --- | --- | --- | --- | --- | --- | --- | --- | --- |
|  | | | | | | | | | **Overall Model Test** | | |
| **Model** | **Deviance** | | **AIC** | | **BIC** | | **R²McF** | | **χ²** | **df** | **p** |
| 1 | 372 | | 396 | | 434 | | 0.0661 | | 26.4 | 8 | <.001 |
| Note. Models estimated using sample size of N=176 | | | | | | | | | | | |
| Omnibus Likelihood Ratio Tests | | | | | | | |
| **Predictor** | | **χ²** | | **df** | | **p** | |
| Projects_Created | | 14.67 | | 4 | | 0.005 | |
| Projects_Backed | | 9.51 | | 4 | | 0.050 | |

| Model Coefficients - Funders_Category (Day 5) | | | | | | | | |
| --- | --- | --- | --- | --- | --- | --- | --- | --- |
|  | | | **95% Confidence Interval** | |  | | | |
| **Funders_Category (Day 5)** | **Predictor** | **Estimate** | **Lower** | **Upper** | **SE** | **Z** | **p** | **Odds ratio** |
| **>100 - <40** | **Intercept** | -1.45541 | -1.95342 | -0.9574 | 0.25409 | -5.728 | <.001 | 0.2333 |
| **Projects_Created** | 0.15172 | 0.03585 | 0.2676 | 0.05912 | 2.566 | 0.010 | 1.1638 |
| **Projects_Backed** | 0.01480 | -0.00164 | 0.0312 | 0.00839 | 1.765 | 0.078 | 1.0149 |
| **>80<100 - <40** | **Intercept** | -3.76455 | -5.10958 | -2.4195 | 0.68625 | -5.486 | <.001 | 0.0232 |
| **Projects_Created** | 0.10806 | -0.14999 | 0.3661 | 0.13166 | 0.821 | 0.412 | 1.1141 |
| **Projects_Backed** | 0.01884 | -0.00588 | 0.0436 | 0.01261 | 1.494 | 0.135 | 1.0190 |
| **>60<80 - <40** | **Intercept** | -1.78184 | -2.86785 | -0.6958 | 0.55410 | -3.216 | 0.001 | 0.1683 |
| **Projects_Created** | -0.45609 | -1.11623 | 0.2041 | 0.33682 | -1.354 | 0.176 | 0.6338 |
| **Projects_Backed** | 0.03351 | 0.00863 | 0.0584 | 0.01269 | 2.640 | 0.008 | 1.0341 |
| **>40<60 - <40** | **Intercept** | -2.32920 | -3.03678 | -1.6216 | 0.36102 | -6.452 | <.001 | 0.0974 |
| **Projects_Created** | 0.12394 | -0.02164 | 0.2695 | 0.07428 | 1.669 | 0.095 | 1.1320 |
| **Projects_Backed** | 0.00969 | -0.01213 | 0.0315 | 0.01113 | 0.870 | 0.384 | 1.0097 |

**Multinomial Logistic Regression( ( Day 10 funder category as dependent variable, Day5 funders (Project backed and Project created)**

| Model Fit Measures | | | | | | | |
| --- | --- | --- | --- | --- | --- | --- | --- |
|  | | | | | **Overall Model Test** | | |
| **Model** | **Deviance** | **AIC** | **BIC** | **R²McF** | **χ²** | **df** | **p** |
| 1 | 393 | 417 | 455 | 0.0542 | 22.5 | 8 | 0.004 |
| Note. Models estimated using sample size of N=176 | | | | | | | |

| Omnibus Likelihood Ratio Tests | | | |
| --- | --- | --- | --- |
| **Predictor** | **χ²** | **df** | **p** |
| Projects_Backed (2) | 6.28 | 4 | 0.179 |
| Projects_Created (2) | 9.73 | 4 | 0.045 |

| Model Coefficients - Funders_Category (Day 10) | | | | | | | | |
| --- | --- | --- | --- | --- | --- | --- | --- | --- |
|  | | | **95% Confidence Interval** | |  | | | |
| **Funders_Category (Day 10)** | **Predictor** | **Estimate** | **Lower** | **Upper** | **SE** | **Z** | **p** | **Odds ratio** |
| **>100 - <40** | **Intercept** | -1.5115 | -2.02101 | -1.0019 | 0.25998 | -5.8137 | <.001 | 0.2206 |
| **Projects_Backed (2)** | 0.0168 | -7.49e−4 | 0.0343 | 0.00894 | 1.8762 | 0.061 | 1.0169 |
| **Projects_Created (2)** | 0.1484 | 0.03377 | 0.2630 | 0.05848 | 2.5374 | 0.011 | 1.1600 |
| **>80<100 - <40** | **Intercept** | -2.7827 | -3.70738 | -1.8580 | 0.47179 | -5.8981 | <.001 | 0.0619 |
| **Projects_Backed (2)** | 0.0211 | -1.28e−4 | 0.0423 | 0.01083 | 1.9482 | 0.051 | 1.0213 |
| **Projects_Created (2)** | 0.0571 | -0.17034 | 0.2845 | 0.11604 | 0.4921 | 0.623 | 1.0588 |
| **>60<80 - <40** | **Intercept** | -2.3631 | -3.55978 | -1.1663 | 0.61058 | -3.8702 | <.001 | 0.0941 |
| **Projects_Backed (2)** | 8.30e-4 | -0.06636 | 0.0680 | 0.03428 | 0.0242 | 0.981 | 1.0008 |
| **Projects_Created (2)** | -0.1688 | -0.77610 | 0.4385 | 0.30986 | -0.5447 | 0.586 | 0.8447 |
| **>40<60 - <40** | **Intercept** | -2.0845 | -2.73511 | -1.4338 | 0.33197 | -6.2791 | <.001 | 0.1244 |
| **Projects_Backed (2)** | 0.0163 | -0.00305 | 0.0357 | 0.00989 | 1.6516 | 0.099 | 1.0165 |
| **Projects_Created (2)** | 0.1032 | -0.03963 | 0.2460 | 0.07288 | 1.4162 | 0.157 | 1.1087 |

**Multinomial Logistic Regression ( Day 20 funder category as dependent variable, Day10 funders (Project backed and Project created)**

| Model Fit Measures | | | | | | | | | | | |
| --- | --- | --- | --- | --- | --- | --- | --- | --- | --- | --- | --- |
|  | | | | | | | | | **Overall Model Test** | | |
| **Model** | **Deviance** | **AIC** | | **BIC** | | | **R²McF** | | **χ²** | **df** | **p** |
| 1 | 401 | 425 | | 463 | | | 0.0583 | | 24.9 | 8 | 0.002 |
| Note. Models estimated using sample size of N=176 | | | | | | | | | | | |
| Omnibus Likelihood Ratio Tests | | | | | | | |
| **Predictor** | | | **χ²** | | **df** | **p** | |
| Projects_Backed (3) | | | 7.93 | | 4 | 0.094 | |
| Projects_Created (3) | | | 9.30 | | 4 | 0.054 | |

| Model Coefficients - Funders_Category (Day 20) | | | | | | | | |
| --- | --- | --- | --- | --- | --- | --- | --- | --- |
|  | | | **95% Confidence Interval** | |  | | | |
| **Funders_Category (Day 20)** | **Predictor** | **Estimate** | **Lower** | **Upper** | **SE** | **Z** | **p** | **Odds ratio** |
| **>100 - <40** | **Intercept** | -1.1674 | -1.64664 | -0.6882 | 0.2445 | -4.775 | <.001 | 0.3112 |
| **Projects_Backed (3)** | 0.0223 | 0.00105 | 0.0436 | 0.0109 | 2.056 | 0.040 | 1.0226 |
| **Projects_Created (3)** | 0.1416 | 0.02263 | 0.2606 | 0.0607 | 2.333 | 0.020 | 1.1521 |
| **>80<100 - <40** | **Intercept** | -2.1442 | -3.42948 | -0.8588 | 0.6558 | -3.270 | 0.001 | 0.1172 |
| **Projects_Backed (3)** | -0.0278 | -0.18641 | 0.1307 | 0.0809 | -0.344 | 0.731 | 0.9725 |
| **Projects_Created (3)** | -0.2105 | -0.94737 | 0.5264 | 0.3760 | -0.560 | 0.576 | 0.8102 |
| **>60<80 - <40** | **Intercept** | -2.7446 | -3.59922 | -1.8900 | 0.4360 | -6.295 | <.001 | 0.0643 |
| **Projects_Backed (3)** | 0.0173 | -0.00972 | 0.0444 | 0.0138 | 1.255 | 0.209 | 1.0175 |
| **Projects_Created (3)** | 0.1456 | -0.00864 | 0.2998 | 0.0787 | 1.850 | 0.064 | 1.1567 |
| **>40<60 - <40** | **Intercept** | -2.0910 | -2.80808 | -1.3739 | 0.3659 | -5.715 | <.001 | 0.1236 |
| **Projects_Backed (3)** | 0.0241 | 5.67e-4 | 0.0476 | 0.0120 | 2.007 | 0.045 | 1.0244 |
| **Projects_Created (3)** | 0.0600 | -0.12797 | 0.2479 | 0.0959 | 0.625 | 0.532 | 1.0618 |

**Multinomial Logistic Regression(( Day 25 funder category as dependent variable, Day20 funders (Project backed and Project created)**

| Model Fit Measures | | | | | | | | | | | |
| --- | --- | --- | --- | --- | --- | --- | --- | --- | --- | --- | --- |
|  | | | | | | | | | **Overall Model Test** | | |
| **Model** | **Deviance** | **AIC** | | **BIC** | | | **R²McF** | | **χ²** | **df** | **p** |
| 1 | 395 | 419 | | 457 | | | 0.0515 | | 21.5 | 8 | 0.006 |
| Note. Models estimated using sample size of N=176 | | | | | | | | | | | |
| Omnibus Likelihood Ratio Tests | | | | | | | |
| **Predictor** | | | **χ²** | | **df** | **p** | |
| Projects_Backed (3) | | | 6.62 | | 4 | 0.158 | |
| Projects_Created (3) | | | 8.30 | | 4 | 0.081 | |

| Model Coefficients - Funders_Category (Day 25) | | | | | | | | |
| --- | --- | --- | --- | --- | --- | --- | --- | --- |
|  | | | **95% Confidence Interval** | |  | | | |
| **Funders_Category (Day 25)** | **Predictor** | **Estimate** | **Lower** | **Upper** | **SE** | **Z** | **p** | **Odds ratio** |
| **>100 - <40** | **Intercept** | -0.9917 | -1.45278 | -0.5307 | 0.2352 | -4.2160 | <.001 | 0.3709 |
| **Projects_Backed (3)** | 0.0211 | -2.73e−5 | 0.0422 | 0.0108 | 1.9574 | 0.050 | 1.0213 |
| **Projects_Created (3)** | 0.1308 | 0.01292 | 0.2487 | 0.0601 | 2.1747 | 0.030 | 1.1397 |
| **>80<100 - <40** | **Intercept** | -2.8887 | -4.12336 | -1.6540 | 0.6300 | -4.5855 | <.001 | 0.0557 |
| **Projects_Backed (3)** | 0.0110 | -0.04312 | 0.0651 | 0.0276 | 0.3985 | 0.690 | 1.0111 |
| **Projects_Created (3)** | -0.0222 | -0.46624 | 0.4219 | 0.2266 | -0.0978 | 0.922 | 0.9781 |
| **>60<80 - <40** | **Intercept** | -2.9012 | -3.79111 | -2.0114 | 0.4540 | -6.3901 | <.001 | 0.0550 |
| **Projects_Backed (3)** | 0.0228 | -9.15e−4 | 0.0465 | 0.0121 | 1.8843 | 0.060 | 1.0230 |
| **Projects_Created (3)** | 0.1588 | 0.01021 | 0.3074 | 0.0758 | 2.0946 | 0.036 | 1.1721 |
| **>40<60 - <40** | **Intercept** | -1.9688 | -2.70456 | -1.2330 | 0.3754 | -5.2446 | <.001 | 0.1396 |
| **Projects_Backed (3)** | 0.0202 | -0.00529 | 0.0458 | 0.0130 | 1.5539 | 0.120 | 1.0204 |
| **Projects_Created (3)** | 0.0210 | -0.20172 | 0.2438 | 0.1136 | 0.1850 | 0.853 | 1.0212 |

**Multinomial Logistic Regression(( Day 29 funder category as dependent variable, Day25 funders (Project backed and Project created)**

| Model Fit Measures | | | | | | | |
| --- | --- | --- | --- | --- | --- | --- | --- |
|  | | | | | **Overall Model Test** | | |
| **Model** | **Deviance** | **AIC** | **BIC** | **R²McF** | **χ²** | **df** | **p** |
| 1 | 401 | 425 | 463 | 0.0525 | 22.2 | 8 | 0.005 |
| Note. Models estimated using sample size of N=176 | | | | | | | |

| Omnibus Likelihood Ratio Tests | | | |
| --- | --- | --- | --- |
| **Predictor** | **χ²** | **df** | **p** |
| Projects_Backed | 7.62 | 4 | 0.107 |
| Projects_Created | 7.47 | 4 | 0.113 |

| Model Coefficients - Funders_Category (Day 29) | | | | | | | | |
| --- | --- | --- | --- | --- | --- | --- | --- | --- |
|  | | | **95% Confidence Interval** | |  | | | |
| **Funders_Category (Day 29)** | **Predictor** | **Estimate** | **Lower** | **Upper** | **SE** | **Z** | **p** | **Odds ratio** |
| **>100 - <40** | **Intercept** | -0.79552 | -1.24722 | -0.3438 | 0.2305 | -3.452 | <.001 | 0.4513 |
| **Projects_Backed** | 0.02024 | -5.46e−4 | 0.0410 | 0.0106 | 1.908 | 0.056 | 1.0205 |
| **Projects_Created** | 0.11853 | 0.00241 | 0.2346 | 0.0592 | 2.001 | 0.045 | 1.1258 |
| **>80<100 - <40** | **Intercept** | -3.49492 | -4.84851 | -2.1413 | 0.6906 | -5.061 | <.001 | 0.0304 |
| **Projects_Backed** | 0.02570 | -0.00193 | 0.0533 | 0.0141 | 1.823 | 0.068 | 1.0260 |
| **Projects_Created** | 0.07149 | -0.22585 | 0.3688 | 0.1517 | 0.471 | 0.637 | 1.0741 |
| **>60<80 - <40** | **Intercept** | -2.48787 | -3.27702 | -1.6987 | 0.4026 | -6.179 | <.001 | 0.0831 |
| **Projects_Backed** | 0.02263 | -1.55e−4 | 0.0454 | 0.0116 | 1.947 | 0.052 | 1.0229 |
| **Projects_Created** | 0.13610 | -0.00811 | 0.2803 | 0.0736 | 1.850 | 0.064 | 1.1458 |
| **>40<60 - <40** | **Intercept** | -1.61144 | -2.42282 | -0.8001 | 0.4140 | -3.893 | <.001 | 0.1996 |
| **Projects_Backed** | -0.00602 | -0.06841 | 0.0564 | 0.0318 | -0.189 | 0.850 | 0.9940 |
| **Projects_Created** | -0.07868 | -0.42117 | 0.2638 | 0.1747 | -0.450 | 0.653 | 0.9243 |

**Appendix-II**

**Results of LDA**

**Linear Discriminant Analysis( Funders status Day 5 –Dependent Variable and Funders day 1 other variables as independent Variable)**

# Linear Discriminant Analysis

Instructions

| Prior probability of groups | |
| --- | --- |
|  | **Value** |
| **>100** | 0.2500 |
| **>80<100** | 0.0227 |
| **>60<80** | 0.0625 |
| **>40<60** | 0.0852 |
| **<40** | 0.5795 |

| Group means | | | | | | |
| --- | --- | --- | --- | --- | --- | --- |
|  | **Projects_Created** | **Projects_Backed** | **FAQ_Count(Day 1)** | **Update_Count(Day1)** | **Comment_Count(Day1)** | **Funders (Day 5)** |
| **>100** | 4.818 | 21.795 | 4.795 | 5.227 | 83.932 | 375.386 |
| **>80<100** | 4.000 | 28.500 | 2.500 | 3.750 | 11.250 | 88.750 |
| **>60<80** | 1.818 | 25.818 | 2.364 | 3.909 | 11.455 | 70.545 |
| **>40<60** | 3.733 | 12.467 | 2.600 | 4.067 | 4.000 | 49.933 |
| **<40** | 2.088 | 5.039 | 1.814 | 1.245 | 0.882 | 10.657 |

| Coefficients of linear discriminants | | | | | | | | | | | | | | | | | | |
| --- | --- | --- | --- | --- | --- | --- | --- | --- | --- | --- | --- | --- | --- | --- | --- | --- | --- | --- |
|  | | | | | **LD1** | | | | | | **LD2** | | | | **LD3** | | **LD4** | |
| **Projects_Created** | | | | | 0.05708 | | | | | | -0.03231 | | | | -0.22177 | | -0.14542 | |
| **Projects_Backed** | | | | | 0.00366 | | | | | | -0.00611 | | | | 0.02524 | | -0.01826 | |
| **`FAQ_Count(Day 1)`** | | | | | 0.05221 | | | | | | 0.00818 | | | | -0.02416 | | 0.00122 | |
| **`Update_Count(Day1)`** | | | | | 0.10668 | | | | | | -0.27527 | | | | -0.06384 | | 0.13984 | |
| **`Comment_Count(Day1)`** | | | | | -0.00624 | | | | | | -0.00190 | | | | 3.58e-4 | | 3.76e-5 | |
| **`Funders (Day 5)`** | | | | | 0.00521 | | | | | | 0.00390 | | | | 0.00132 | | 3.93e-4 | |
| Normalized loadings | | | | | | | | | | | | | | | | | |
|  | | | | | **LD1** | | | **LD2** | | | | | | **LD3** | | **LD4** | |
| **Projects_Created** | | | | | 0.4322 | | | -0.11649 | | | | | | -0.95013 | | -0.71786 | |
| **Projects_Backed** | | | | | 0.0277 | | | -0.02202 | | | | | | 0.10812 | | -0.09013 | |
| **`FAQ_Count(Day 1)`** | | | | | 0.3953 | | | 0.02950 | | | | | | -0.10350 | | 0.00601 | |
| **`Update_Count(Day1)`** | | | | | 0.8077 | | | -0.99239 | | | | | | -0.27352 | | 0.69030 | |
| **`Comment_Count(Day1)`** | | | | | -0.0472 | | | -0.00683 | | | | | | 0.00153 | | 1.86e-4 | |
| **`Funders (Day 5)`** | | | | | 0.0395 | | | 0.01404 | | | | | | 0.00564 | | 0.00194 | |
| Proportion of trace | | | | | | |
|  | | | **LD1** | **LD2** | | |
| **Proportion(%)** | | | 0.901 | 0.0701 | | |
| Confusion matrix with training set | | | | | | | | | | | | |
|  | **Predicted** | | | | | | | | | | | |
|  | **>100** | **>80<100** | | **>60<80** | | **>40<60** | | | | **<40** | | |
| **>100** | 24 | 0 | | 1 | | 1 | | | | 18 | | |
| **>80<100** | 0 | 0 | | 1 | | 0 | | | | 3 | | |
| **>60<80** | 1 | 0 | | 0 | | 1 | | | | 9 | | |
| **>40<60** | 0 | 0 | | 0 | | 3 | | | | 12 | | |
| **<40** | 1 | 0 | | 0 | | 0 | | | | 101 | | |
| Confusion matrix with test set | | | | | | | | | | | |
|  | **Predicted** | | | | | | | | | | |
|  | **>100** | **>80<100** | | **>60<80** | | **>40<60** | | | **<40** | | |
| **>100** | 0 | 0 | | 0 | | 0 | | | 0 | | |
| **>80<100** | 0 | 0 | | 0 | | 0 | | | 0 | | |
| **>60<80** | 0 | 0 | | 0 | | 0 | | | 0 | | |
| **>40<60** | 0 | 0 | | 0 | | 0 | | | 0 | | |
| **<40** | 0 | 0 | | 0 | | 0 | | | 0 | | |

## Linear discriminant plot


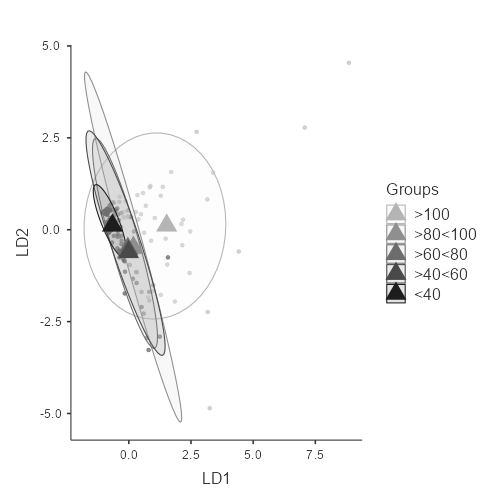


| Group centroids | | |
| --- | --- | --- |
| **Groups** | **LD1** | **LD2** |
| >100 | 1.52187 | 0.116 |
| >80<100 | 0.18215 | -0.490 |
| >60<80 | -0.03847 | -0.519 |
| >40<60 | -0.00974 | -0.607 |
| <40 | -0.65805 | 0.115 |

**Linear Discriminant Analysis ( Funders status Day 10 –Dependent Variable and Funders day 5 other variables as independent Variable)**

# Linear Discriminant Analysis

Instructions

| Prior probability of groups | |
| --- | --- |
|  | **Value** |
| **>100** | 0.2330 |
| **>80<100** | 0.0511 |
| **>60<80** | 0.0398 |
| **>40<60** | 0.1080 |
| **<40** | 0.5682 |

| Group means | | | | | | |
| --- | --- | --- | --- | --- | --- | --- |
|  | **Projects_Created** | **Projects_Backed** | **FAQ_Count (Day 5)** | **Update_Count (Day 5)** | **Comment_Count (Day 5)** | **Funders (Day 5)** |
| **>100** | 4.854 | 22.537 | 3.976 | 2.073 | 37.756 | 390.976 |
| **>80<100** | 3.333 | 28.333 | 4.556 | 1.222 | 6.000 | 93.889 |
| **>60<80** | 1.571 | 4.429 | 2.143 | 1.857 | 2.000 | 69.143 |
| **>40<60** | 3.579 | 18.684 | 1.632 | 1.737 | 1.632 | 43.158 |
| **<40** | 2.090 | 4.930 | 1.930 | 0.460 | 0.320 | 13.050 |

| Coefficients of linear discriminants | | | | |
| --- | --- | --- | --- | --- |
|  | **LD1** | **LD2** | **LD3** | **LD4** |
| **Projects_Created** | 0.05215 | -0.03010 | 0.05833 | -0.19034 |
| **Projects_Backed** | 0.00378 | 0.00862 | 0.02501 | 7.14e-5 |
| **`FAQ_Count (Day 5)`** | 0.03329 | 0.07415 | 0.10490 | 0.11347 |
| **`Update_Count (Day 5)`** | 0.18283 | -0.66630 | -0.12128 | 0.15204 |
| **`Comment_Count (Day 5)`** | -0.00471 | -0.00133 | 0.00214 | -0.00127 |
| **`Funders (Day 5)`** | 0.00419 | 0.00231 | -0.00188 | 2.43e-4 |

| Normalized loadings | | | | | | | | | | | | | | | | | | | |
| --- | --- | --- | --- | --- | --- | --- | --- | --- | --- | --- | --- | --- | --- | --- | --- | --- | --- | --- | --- |
|  | | | | | | | **LD1** | | | | | **LD2** | | | | **LD3** | | | **LD4** |
| **Projects_Created** | | | | | | | 0.2700 | | | | | -0.04485 | | | | 0.3382 | | | -0.70826 |
| **Projects_Backed** | | | | | | | 0.0196 | | | | | 0.01284 | | | | 0.1450 | | | 2.65e-4 |
| **`FAQ_Count (Day 5)`** | | | | | | | 0.1723 | | | | | 0.11048 | | | | 0.6082 | | | 0.42222 |
| **`Update_Count (Day 5)`** | | | | | | | 0.9465 | | | | | -0.99278 | | | | -0.7032 | | | 0.56575 |
| **`Comment_Count (Day 5)`** | | | | | | | -0.0244 | | | | | -0.00199 | | | | 0.0124 | | | -0.00471 |
| **`Funders (Day 5)`** | | | | | | | 0.0217 | | | | | 0.00344 | | | | -0.0109 | | | 9.05e-4 |
| Proportion of trace | | | | | | | | | | | | | |
|  | | | | | **LD1** | | | | **LD2** | | | | |
| **Proportion(%)** | | | | | 0.858 | | | | 0.0906 | | | | |
| Confusion matrix with training set | | | | | | | | | | | | | | | | | |
|  | | | **Predicted** | | | | | | | | | | | | | | |
|  | | | **>100** | | | **>80<100** | | | | **>60<80** | | | | | **>40<60** | | **<40** |
| **>100** | | | 20 | | | 1 | | | | 0 | | | | | 0 | | 20 |
| **>80<100** | | | 1 | | | 1 | | | | 0 | | | | | 0 | | 7 |
| **>60<80** | | | 0 | | | 0 | | | | 0 | | | | | 2 | | 5 |
| **>40<60** | | | 1 | | | 1 | | | | 0 | | | | | 2 | | 15 |
| **<40** | | | 0 | | | 1 | | | | 0 | | | | | 2 | | 97 |
| Confusion matrix with test set | | | | | | | | | | | | |
|  | **Predicted** | | | | | | | | | | | |
|  | **>100** | **>80<100** | | **>60<80** | | | | **>40<60** | | | **<40** | |
| **>100** | 0 | 0 | | 0 | | | | 0 | | | 0 | |
| **>80<100** | 0 | 0 | | 0 | | | | 0 | | | 0 | |
| **>60<80** | 0 | 0 | | 0 | | | | 0 | | | 0 | |
| **>40<60** | 0 | 0 | | 0 | | | | 0 | | | 0 | |
| **<40** | 0 | 0 | | 0 | | | | 0 | | | 0 | |

## Linear discriminant plot


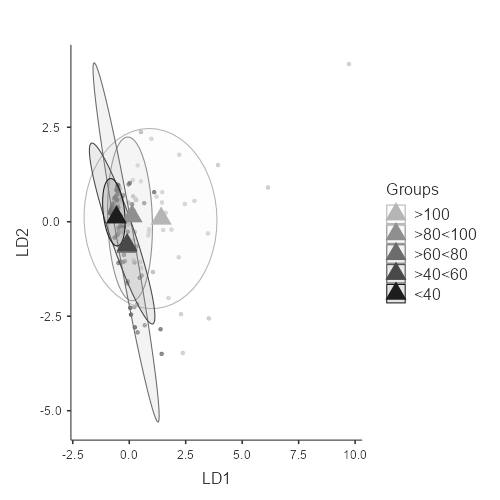


| Group centroids | | |
| --- | --- | --- |
| **Groups** | **LD1** | **LD2** |
| >100 | 1.4143 | 0.0832 |
| >80<100 | 0.1258 | 0.1459 |
| >60<80 | -0.1055 | -0.6607 |
| >40<60 | -0.0930 | -0.6155 |
| <40 | -0.5661 | 0.1160 |

**Linear Discriminant Analysis( Funders status Day 20 –Dependent Variable and Funders day 10 other variables as independent Variable)**

# Linear Discriminant Analysis

Instructions

| Prior probability of groups | | |
| --- | --- | --- |
|  | | **Value** |
| **>100** | | 0.2955 |
| **>80<100** | | 0.0398 |
| **>60<80** | | 0.0568 |
| **>40<60** | | 0.0909 |
| **<40** | | 0.5170 |
| Group means | | | | | | | | |
|  | **Projects_Created** | | | **Projects_Backed** | **FAQ_Count (Day 10)** | **Update_Count (Day 10)** | **Funders (Day 10)** | **Comment_Count (Day 10)** |
| **>100** | 4.462 | | | 22.788 | 4.173 | 2.115 | 365.269 | 38.269 |
| **>80<100** | 1.429 | | | 2.143 | 0.714 | 1.429 | 61.286 | 0.857 |
| **>60<80** | 4.300 | | | 14.700 | 1.400 | 2.200 | 55.500 | 3.500 |
| **>40<60** | 3.063 | | | 21.063 | 2.000 | 1.500 | 38.875 | 1.563 |
| **<40** | 2.011 | | | 4.110 | 1.923 | 0.462 | 9.044 | 0.209 |

| Coefficients of linear discriminants | | | | |
| --- | --- | --- | --- | --- |
|  | **LD1** | **LD2** | **LD3** | **LD4** |
| **Projects_Created** | 0.07233 | 0.05058 | 0.09102 | -0.2267 |
| **Projects_Backed** | 0.00751 | -0.00333 | 0.02045 | 0.0222 |
| **`FAQ_Count (Day 10)`** | 0.04297 | -0.10199 | 0.09448 | -0.0389 |
| **`Update_Count (Day 10)`** | 0.26944 | 0.60923 | -0.17943 | 0.0324 |
| **`Funders (Day 10)`** | 0.00249 | -0.00238 | -0.00181 | 6.03e-4 |
| **`Comment_Count (Day 10)`** | -0.00203 | -3.88e−5 | 0.00287 | -6.04e−4 |

| Normalized loadings | | | | |
| --- | --- | --- | --- | --- |
|  | **LD1** | **LD2** | **LD3** | **LD4** |
| **Projects_Created** | 0.25614 | 0.08161 | 0.40774 | -0.97155 |
| **Projects_Backed** | 0.02661 | -0.00538 | 0.09160 | 0.09513 |
| **`FAQ_Count (Day 10)`** | 0.15216 | -0.16455 | 0.42323 | -0.16670 |
| **`Update_Count (Day 10)`** | 0.95415 | 0.98297 | -0.80375 | 0.13868 |
| **`Funders (Day 10)`** | 0.00883 | -0.00384 | -0.00813 | 0.00258 |
| **`Comment_Count (Day 10)`** | -0.00720 | -6.26e−5 | 0.01286 | -0.00259 |

| Proportion of trace | | | | | |
| --- | --- | --- | --- | --- | --- |
|  | | **LD1** | | **LD2** | |
| **Proportion(%)** | | 0.830 | | 0.140 | |
| Confusion matrix with training set | | | | | | | | |
|  | **Predicted** | | | | | | | |
|  | **>100** | | **>80<100** | | **>60<80** | | **>40<60** | **<40** |
| **>100** | 29 | | 0 | | 0 | | 0 | 23 |
| **>80<100** | 0 | | 0 | | 1 | | 0 | 6 |
| **>60<80** | 1 | | 0 | | 2 | | 0 | 7 |
| **>40<60** | 4 | | 0 | | 0 | | 0 | 12 |
| **<40** | 2 | | 0 | | 1 | | 0 | 88 |

| Confusion matrix with test set | | | | | |
| --- | --- | --- | --- | --- | --- |
|  | **Predicted** | | | | |
|  | **>100** | **>80<100** | **>60<80** | **>40<60** | **<40** |
| **>100** | 0 | 0 | 0 | 0 | 0 |
| **>80<100** | 0 | 0 | 0 | 0 | 0 |
| **>60<80** | 0 | 0 | 0 | 0 | 0 |
| **>40<60** | 0 | 0 | 0 | 0 | 0 |
| **<40** | 0 | 0 | 0 | 0 | 0 |

## Linear discriminant plot


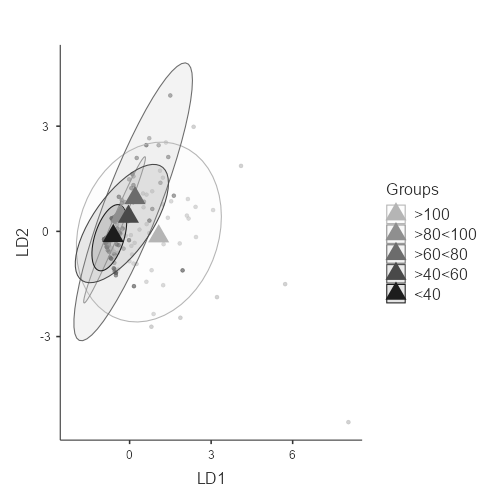


| Group centroids | | |
| --- | --- | --- |
| **Groups** | **LD1** | **LD2** |
| >100 | 1.0696 | -0.141 |
| >80<100 | -0.3203 | 0.434 |
| >60<80 | 0.1993 | 0.951 |
| >40<60 | -0.0427 | 0.419 |
| <40 | -0.6009 | -0.131 |

**Linear Discriminant Analysis( Funders status Day 25 –Dependent Variable and Funders day 20 other variables as independent Variable)**

# Linear Discriminant Analysis

Instructions

| Prior probability of groups | |
| --- | --- |
|  | **Value** |
| **>100** | 0.3239 |
| **>80<100** | 0.0284 |
| **>60<80** | 0.0568 |
| **>40<60** | 0.0852 |
| **<40** | 0.5057 |

| Group means | | | | | | |
| --- | --- | --- | --- | --- | --- | --- |
|  | **Projects_Created** | **Projects_Backed** | **Funders (Day 20)** | **FAQ_Count (Day 20)** | **Update_Count (Day 20)** | **Comment_Count (Day 20)** |
| **>100** | 4.175 | 20.789 | 444.211 | 3.842 | 3.053 | 49.474 |
| **>80<100** | 2.000 | 6.400 | 83.400 | 6.200 | 3.000 | 5.800 |
| **>60<80** | 5.200 | 27.000 | 63.800 | 0.800 | 2.600 | 3.300 |
| **>40<60** | 2.533 | 13.800 | 44.200 | 2.333 | 1.933 | 2.267 |
| **<40** | 2.011 | 4.090 | 9.843 | 1.933 | 0.708 | 0.360 |

| Coefficients of linear discriminants | | | | |
| --- | --- | --- | --- | --- |
|  | **LD1** | **LD2** | **LD3** | **LD4** |
| **Projects_Created** | 0.07791 | -0.11055 | -0.05696 | 0.22617 |
| **Projects_Backed** | 0.00655 | -0.00593 | -0.00596 | -0.01692 |
| **`Funders (Day 20)`** | 0.00136 | 0.00169 | -0.00135 | -1.55e−4 |
| **`FAQ_Count (Day 20)`** | 0.02907 | 0.08994 | 0.13547 | 0.08357 |
| **`Update_Count (Day 20)`** | 0.25912 | -0.21903 | 0.25328 | -0.09271 |
| **`Comment_Count (Day 20)`** | -0.00138 | -3.22e−5 | -0.00113 | -0.00187 |

| Normalized loadings | | | | |
| --- | --- | --- | --- | --- |
|  | **LD1** | **LD2** | **LD3** | **LD4** |
| **Projects_Created** | 0.28620 | -0.42295 | -0.19447 | 0.87363 |
| **Projects_Backed** | 0.02406 | -0.02268 | -0.02036 | -0.06534 |
| **`Funders (Day 20)`** | 0.00501 | 0.00646 | -0.00461 | -5.97e−4 |
| **`FAQ_Count (Day 20)`** | 0.10678 | 0.34408 | 0.46252 | 0.32282 |
| **`Update_Count (Day 20)`** | 0.95187 | -0.83796 | 0.86475 | -0.35809 |
| **`Comment_Count (Day 20)`** | -0.00508 | -1.23e−4 | -0.00386 | -0.00722 |

| Proportion of trace | | |
| --- | --- | --- |
|  | **LD1** | **LD2** |
| **Proportion(%)** | 0.832 | 0.0995 |

| Confusion matrix with training set | | | | | |
| --- | --- | --- | --- | --- | --- |
|  | **Predicted** | | | | |
|  | **>100** | **>80<100** | **>60<80** | **>40<60** | **<40** |
| **>100** | 27 | 0 | 1 | 0 | 29 |
| **>80<100** | 1 | 1 | 0 | 0 | 3 |
| **>60<80** | 5 | 0 | 0 | 0 | 5 |
| **>40<60** | 3 | 0 | 0 | 0 | 12 |
| **<40** | 3 | 1 | 0 | 0 | 85 |
| Confusion matrix with test set | | | | | |
|  | **Predicted** | | | | |
|  | **>100** | **>80<100** | **>60<80** | **>40<60** | **<40** |
| **>100** | 0 | 0 | 0 | 0 | 0 |
| **>80<100** | 0 | 0 | 0 | 0 | 0 |
| **>60<80** | 0 | 0 | 0 | 0 | 0 |
| **>40<60** | 0 | 0 | 0 | 0 | 0 |
| **<40** | 0 | 0 | 0 | 0 | 0 |

## Linear discriminant plot


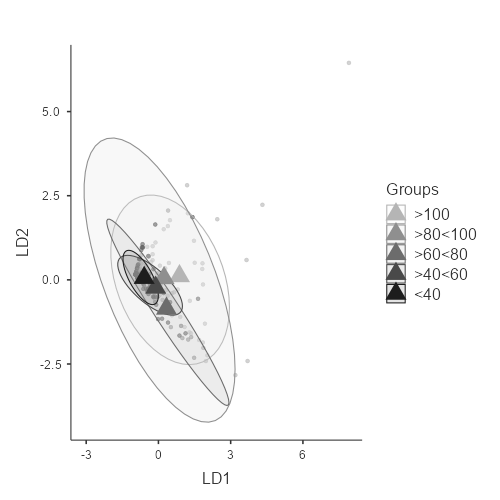


| Group centroids | | |
| --- | --- | --- |
| **Groups** | **LD1** | **LD2** |
| >100 | 0.874 | 0.1116 |
| >80<100 | 0.234 | 0.0534 |
| >60<80 | 0.334 | -0.8535 |
| >40<60 | -0.114 | -0.2296 |
| <40 | -0.591 | 0.0601 |

**Linear Discriminant Analysis( Funders status Day 29 –Dependent Variable and Funders day 25 other variables as independent Variable)**

# Linear Discriminant Analysis

Instructions

| Prior probability of groups | |
| --- | --- |
|  | **Value** |
| **>100** | 0.3523 |
| **>80<100** | 0.0227 |
| **>60<80** | 0.0739 |
| **>40<60** | 0.0795 |
| **<40** | 0.4716 |

| Group means | | | | | | |
| --- | --- | --- | --- | --- | --- | --- |
|  | **Projects_Created** | **Projects_Backed** | **FAQ_Count (Day 25)** | **Update_Count (Day 25)** | **Funders (Day 25)** | **Comment_Count (Day 25)** |
| **>100** | 4.000 | 19.403 | 4.032 | 3.532 | 465.984 | 51.694 |
| **>80<100** | 3.500 | 30.000 | 0.250 | 7.750 | 77.750 | 4.250 |
| **>60<80** | 4.692 | 26.308 | 2.692 | 2.846 | 61.462 | 3.923 |
| **>40<60** | 1.714 | 3.143 | 2.429 | 1.643 | 41.357 | 1.357 |
| **<40** | 2.048 | 4.205 | 1.819 | 0.675 | 9.253 | 0.422 |

| Coefficients of linear discriminants | | | | |
| --- | --- | --- | --- | --- |
|  | **LD1** | **LD2** | **LD3** | **LD4** |
| **Projects_Created** | 0.07323 | 0.02195 | 0.1705 | 0.01543 |
| **Projects_Backed** | 0.00533 | 0.00199 | 0.0139 | 0.00762 |
| **`FAQ_Count (Day 25)`** | 0.02018 | 0.09475 | 0.0515 | -0.18031 |
| **`Update_Count (Day 25)`** | 0.31452 | -0.26374 | -0.1103 | -0.07125 |
| **`Funders (Day 25)`** | 6.60e-4 | 0.00178 | -7.24e−4 | 5.88e-4 |
| **`Comment_Count (Day 25)`** | -0.00155 | -6.96e−4 | -7.70e−4 | 0.00330 |

| Normalized loadings | | | | |
| --- | --- | --- | --- | --- |
|  | **LD1** | **LD2** | **LD3** | **LD4** |
| **Projects_Created** | 0.22629 | 0.07808 | 0.81202 | 0.07929 |
| **Projects_Backed** | 0.01647 | 0.00707 | 0.06629 | 0.03916 |
| **`FAQ_Count (Day 25)`** | 0.06234 | 0.33704 | 0.24540 | -0.92625 |
| **`Update_Count (Day 25)`** | 0.97191 | -0.93820 | -0.52533 | -0.36600 |
| **`Funders (Day 25)`** | 0.00204 | 0.00633 | -0.00345 | 0.00302 |
| **`Comment_Count (Day 25)`** | -0.00479 | -0.00247 | -0.00367 | 0.01694 |

| Proportion of trace | | |
| --- | --- | --- |
|  | **LD1** | **LD2** |
| **Proportion(%)** | 0.775 | 0.182 |

| Confusion matrix with training set | | | | | |
| --- | --- | --- | --- | --- | --- |
|  | **Predicted** | | | | |
|  | **>100** | **>80<100** | **>60<80** | **>40<60** | **<40** |
| **>100** | 34 | 2 | 0 | 0 | 26 |
| **>80<100** | 1 | 2 | 0 | 0 | 1 |
| **>60<80** | 7 | 0 | 0 | 0 | 6 |
| **>40<60** | 1 | 0 | 0 | 0 | 13 |
| **<40** | 4 | 1 | 0 | 0 | 78 |

| Confusion matrix with test set | | | | | |
| --- | --- | --- | --- | --- | --- |
|  | **Predicted** | | | | |
|  | **>100** | **>80<100** | **>60<80** | **>40<60** | **<40** |
| **>100** | 0 | 0 | 0 | 0 | 0 |
| **>80<100** | 0 | 0 | 0 | 0 | 0 |
| **>60<80** | 0 | 0 | 0 | 0 | 0 |
| **>40<60** | 0 | 0 | 0 | 0 | 0 |
| **<40** | 0 | 0 | 0 | 0 | 0 |

## Linear discriminant plot


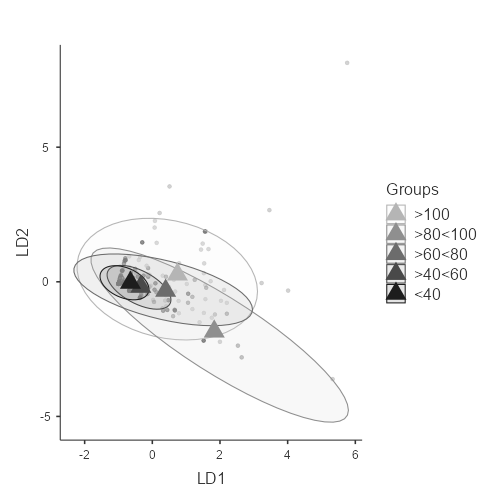


| Group centroids | | |
| --- | --- | --- |
| **Groups** | **LD1** | **LD2** |
| >100 | 0.742 | 0.2732 |
| >80<100 | 1.830 | -1.8450 |
| >60<80 | 0.394 | -0.3302 |
| >40<60 | -0.340 | -0.1832 |
| <40 | -0.647 | -0.0326 |
